# Supplementary material for: Effects of transgenic silk materials that incorporate FGF‐7 protein microcrystals on the proliferation and differentiation of human keratinocytes
Source: PubMed Central journal article supplement (PMC7734426; doi:10.1096/fba.2020-00078), 2020-10-20
Supplement: FBA2-2-734-s001.pdf [file FBA2-2-734-s001.pdf]

1 **SUPPLEMENTAL RESULTS**

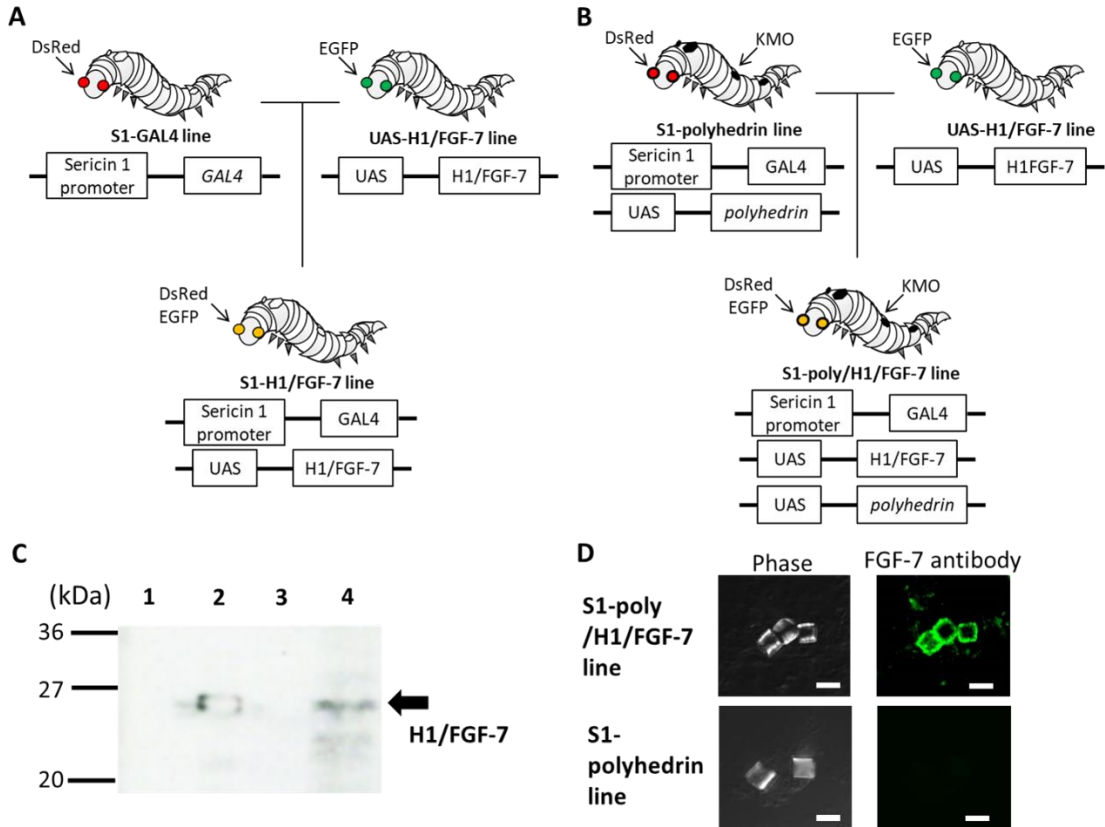

2  
3 **Supplemental Figure S1.** Generation of transgenic silkworms expressing H1/FGF-7 in  
4 the MSG. A) Generation of the S1-H1/FGF-7 line. The S1-GAL4 line (30) was mated  
5 with the UAS-H1/FGF-7 line to generate the S1-H1/FGF-7 line with EGFP and DsRed  
6 expression in the eyes. B) Generation of the S1-poly/H1/FGF-7 line. The S1-polyhedrin  
7 line was mated with the UAS-H1/FGF-7 line to generate the S1-poly/H1/FGF-7 line with  
8 EGFP and DsRed expression in the eyes and KMO-specific skin (7). C) Immunoblotting  
9 analysis of H1/FGF-7 expression in MSGs with 12.5% SDS-PAGE and anti-FGF-7  
10 antibodies. Lane 1 and 2: Protein from 50,000 cubes of empty polyhedra (negative  
11 control) and FGF-7-polyhedra (positive control) produced in baculovirus-infected Sf21  
12 cells, respectively; Lanes 3 and 4: Immunoprecipitated protein from 50 mg MSGs from  
13 *w1-pnd* and S1-H1/FGF-7 larvae, respectively. Protein size markers are indicated. D)  
14 Confocal immunofluorescence microscopy analysis of H1/FGF-7 on polyhedra.  
15 Polyhedra collected from S1-poly/H1/FGF-7 or S1-polyhedrin larvae MSGs were fixed  
16 on a glass-based dish and examined by an immunofluorescence with an anti-FGF-7  
17 antibody. Scale bars, 10  $\mu$ m.

19 **Supplemental Table S1.** Inverse PCR of the UAS-H1/FGF-7 transgene border  
20 sequence in the *w1-pnd* genome and sequence analysis with the Kaikoblast database  
21 (<http://kaikoblast.dna.affrc.go.jp>). The chromosome number and clone name are listed for  
22 the border sequence. The TTAA consensus sequence appearing at the border of the  
23 *piggyback*-driven transgene is underlined.

---

| Silkworm line | Sequence at the transgene border                           | Chromosome no.<br>(clone name) |
|---------------|------------------------------------------------------------|--------------------------------|
| UAS-H1/FGF-7  | CAAGAATAT <u>TTAA</u> ( transgene ) <u>TTAATAA</u> ACTACCA | Chromosome 8<br>(Bm_scaf51)    |

---

24  
25  
26  
27  
28  
29  
30  
31  
32  
33  
34  
35
